1  
2  
3  
4  
5  
6  
7  
8  
9  
10  
11  
12  
13  
14  
15  
16  
17  
18  
19  
20  
21  
22  
23  
24  
25  
26  
27  
28

## Inter-leg Coordination in the Control of Walking Speed in *Drosophila*

Anne Wosnitza\*, Till Bockemühl\*, Michael Dübbert, Henrike Scholz, and Ansgar Büschges

Biocenter Cologne, Zoological Institute, Dept. for Animal Physiology, Zülpicher Strasse 47b,  
50674 Cologne

\* both authors contributed equally to the work

*Running title:* walking in *Drosophila*

*Keywords:* walking, motor control, sensory feedback, inter-leg coordination

Address for correspondence:

Prof. Dr. A. Büschges  
Biocenter Cologne, Dept. for Animal Physiology  
Zülpicher Strasse 47b  
50674 Cologne, Germany

Phone: 011-49-221-470-2607

Fax: 011-49-221-470-4889

Email: [ansgar.bueschges@uni-koeln.de](mailto:ansgar.bueschges@uni-koeln.de)

29 **Abstract**

30 Legged locomotion is the most common behavior of terrestrial animals and it is assumed to  
31 have become highly optimized during evolution. Quadrupeds, for instance, use distinct gaits  
32 which are optimal with regard to metabolic cost and have characteristic kinematic features  
33 and patterns of inter-leg coordination. In insects, the situation is not as clear. In general, in-  
34 sects are able to alter inter-leg coordination systematically with locomotion speed, producing  
35 a continuum of movement patterns. This notion, however, is based on the study of several  
36 insect species, which differ greatly in size and weight. Each of these species tends to walk at a  
37 rather narrow range of speeds.

38 We have addressed these issues and examined four strains of *Drosophila*, which are similar in  
39 size and weight, but tend to walk at different speed ranges. Our data suggest that *Drosophila*  
40 controls its walking speed almost exclusively via step frequency. At high walking speeds we  
41 invariably found tripod coordination patterns the quality of which increased with speed as  
42 indicated by a simple measure of tripod coordination strength (TCS). At low speeds we also  
43 observed tetrapod coordination and wave gait-like walking patterns. These findings suggest  
44 not only a systematic speed dependence of inter-leg movement patterns, but imply that inter-  
45 leg coordination is flexible. This was further supported by amputation experiments in which  
46 we examined walking behavior in animals after the removal of a hind leg. These animals  
47 show immediate adaptations in body posture, leg kinematics, and inter-leg coordination there-  
48 by maintaining their ability to walk.

49

50 **Introduction**

51 In terrestrial animals, legged locomotion is a behavior that is highly optimized (Alexander,  
52 1989). It is also flexible and can be adapted to the external environment and to specific beha-  
53 vioral goals. The locomotor apparatus often has to be used on a variety of substrates such as  
54 level surfaces, twigs in a bush, or ragged cliffs. Furthermore, the locomotor output can change  
55 from slow explorative walking to swift running when it becomes necessary to escape a preda-  
56 tor or cross terrain without cover.

57 Frequently, changes in locomotor output are not restricted to the movements of single legs but  
58 also entail changes in the temporal coordination between several or all legs. Many quadru-  
59 peds, like cats, dogs or horses, for instance, use specific gaits depending on their movement  
60 speed (Alexander, 1989). In these animals, leg coordination changes from walking and pace  
61 gaits at slow speeds to trotting gaits at intermediate speeds and, eventually, to gallop at high  
62 speeds. The coordination of the front- and hind legs changes from anti-phase in walking to  
63 nearly in-phase during gallop (Orlovsky et al., 1999). The transition from one gait to another  
64 is discontinuous and it can be shown that quadrupeds select the energetically optimal gait at a  
65 given speed (Hoyt and Taylor, 1981).

66 In hexapods, i.e. insects, the situation appears, at first glance, to be comparable. However,  
67 different patterns of leg coordination can occur. These patterns are typically characterized by  
68 the number of legs that are on the substrate during stance. Very slow walking insects, for ex-  
69 ample, generate a metachronal wave of leg movements along each side of the body subse-  
70 quently from back to front while at least five legs are always in stance phase, a coordination  
71 pattern called *wave gait* (Hughes, 1952). For faster walking speed coordination is modified  
72 accompanied by an apparent reduction in the number of legs that are on the ground simulta-  
73 neously. At medium speeds the number of legs is reduced to four, called *tetrapod coordina-*  
74 *tion* (Burns, 1973; Graham, 1972; Hughes, 1952; Spirito and Mushrush, 1979; Wendler,  
75 1964; Wendler 1966), and at high speeds to three, called *tripod coordination* (Bender et al.,  
76 2011; Delcomyn, 1971; Graham, 1985). Interestingly, bipedal anti-phase coordination of in-  
77 sect hind legs has been reported for the cockroach, *Periplaneta americana*, during top speed  
78 running (Full and Tu, 1991). In this situation the anterior part of the animal is lifted and the  
79 front and middle legs no longer touch the ground.

80 While in quadrupeds the switch between two patterns of inter-leg coordination, or gaits, is  
81 distinct and dependent on speed, studies in invertebrates indicate that specific patterns of

82 coordination are part of a larger and speed-dependent continuum and that intermediate forms  
83 of coordination exist. In the same speed range, insects can use either tetrapod or tripod coor-  
84 dination, seamlessly transitioning from one to the other by modifying stance duration (Cruse,  
85 1990; Graham, 1985; Wendler, 1966). Several genera of ants (*Cataglyphis*, *Formica*, *Lasius*,  
86 and *Myrmica*), cockroaches (*Periplaneta americana*), fruit flies (*Drosophila melanogaster*),  
87 and stick insects (*Carausius morosus*) are known to use tripod coordination during fast loco-  
88 motion, while at lower speeds leg coordination becomes much more variable, approaching  
89 tetrapod coordination (Wendler, 1964; Graham 1972; Bender et al., 2011; Strauss and  
90 Heisenberg, 1990; Zollikofer, 1994).

91 How is inter-leg coordination achieved? Behavioral studies on four-, six-, and eight-legged  
92 animals have suggested that sensory signals which reflect the movements of individual legs  
93 contribute to the coordination between legs, thereby generating an emergent set of coordina-  
94 tion rules (Cruse, 1990; Dürr et al., 2004). Furthermore, the importance of intersegmental  
95 neural pathways can also be shown based on studies that reduce or eliminate mechanical inte-  
96 raction between legs (Graham and Cruse, 1981; Cruse and Epstein 1982; Gruhn 2006). In  
97 normal walking situations the coordination rules arise from the interplay of mechanical and  
98 neural coupling between individual legs during walking. While it is clear that both mechanical  
99 and neural influences play important roles, their specific contribution for the generation of leg  
100 coordination patterns is not clear, yet. On the one hand, for example, there is evidence con-  
101 firming the importance of central inter-segmental neural pathways for the coordination of  
102 local networks controlling leg movements in insect walking. This has been shown for the  
103 cockroach, *Periplaneta americana* (Pearson and Iles, 1973), the locust, *Schistocerca ameri-*  
104 *cana* (Ryckebusch and Laurent, 1993), and the hawk moth, *Manduca sexta* (Johnston and  
105 Levine, 2002). On the other hand, studies have shown the role of local sensory feedback in  
106 establishing inter-leg coordination, e.g. in the hawk moth (Johnston and Levine, 1996;  
107 Johnston and Levine, 2002) and the stick insect, *Carausius morosus* (Borgmann et al., 2009;  
108 Büschges et al., 1995).

109 One aspect that has so far hindered further elucidation of the neural mechanisms underlying  
110 inter-leg coordination is that insect species at given developmental stages (Graham, 1985)  
111 often show a rather narrow range of preferred walking speeds. For example, while it is known  
112 that cockroaches can use the full range of inter-leg coordination from metachronal wave gait,  
113 in which only one leg is in swing phase at any given time, to tripod coordination (Hughes,  
114 1952), under natural conditions they mostly use tripod coordination (Bender et al., 2011).

115 Adult stick insects also show a preference for a particular coordination pattern. They almost  
116 exclusively use tetrapod coordination during level walking, while at high speeds also use tri-  
117 pod coordination (Graham, 1972). In adult stick insects tripod coordination is less frequent  
118 though; larval stages tend to use tripod coordination much more frequently (Graham, 1972),  
119 but are also much smaller. As a consequence, in the insect groups studied so far only a rather  
120 limited continuum of walking speeds could be investigated reliably. This is all the more unsa-  
121 tisfactory as the specifics of inter-leg coordination are often used as important indicators as to  
122 how the neural mechanisms generating walking behavior are structured (Zollikofer, 1994). It  
123 is therefore critical to determine the full possible range of walking speeds with regard to inter-  
124 leg coordination.

125 In the present study, we used four different *Drosophila* strains in order to address this issue  
126 and capture as large a range of walking speeds as possible in a single species. The two wild-  
127 type strains *Canton-S* ( $w^{CS}$ ) and *Berlin* ( $w^{Berlin}$ ) thereby represented the wild-typical beha-  
128 vior. These two strains have previously been used in studies on inter-leg coordination (Strauss  
129 and Heisenberg, 1990; Strauss and Heisenberg, 1993) and global parameters of locomotor  
130 activities (Martin, 2004; Martin et al., 1999). In addition, we selected two mutant *Drosophila*  
131 strains, *white*<sup>1118</sup> ( $w^{1118}$ ) and  $w^{1118}, Tbh^{nM18}$ , to extend the range of observable walking speeds  
132 to lower values.  $w^{1118}$  flies have reduced levels of octopamine (Sitaraman et al., 2008), while  
133  $w^{1118}, Tbh^{nM18}$  lacks this biogenic amine altogether (Monastirioti et al., 1996). Octopamine is  
134 implicated in the high-level control of locomotor activity (Brembs et al., 2007; Gal and  
135 Libersat, 2008; Gal and Libersat, 2010) and, as we show here, a reduced level or absence of  
136 octopamine seems to induce lower walking speeds in *Drosophila*. Furthermore, the results we  
137 present here for  $w^{1118}$  flies can also serve as a control for future studies in *Drosophila*, since  
138 an extensive amount of transgenic flies have a  $w^{1118}$  background. As we show, there are im-  
139 portant differences between wild-type flies and  $w^{1118}$ , and this might be important for the in-  
140 terpretation of behavioral studies based on transgenic strains.

141 We can show that under relatively unconstrained conditions individuals of different *Drosophi-*  
142 *la* strains cover a broad range of speeds during walking. We find that leg coordination pat-  
143 terns change gradually and systematically with walking speed. This suggests that the neural  
144 controllers responsible for inter-leg coordination are able to generate a marked flexibility with  
145 respect to walking behavior. Furthermore, removing one of the hind legs reveals that *Droso-*  
146 *phila* is capable of adapting its leg coordination immediately, thereby maintaining the ability  
147 to propel itself forward even after major biomechanical changes in its walking apparatus.

149 **Materials and Methods**

150 *Fly strains and breeding*

151 Flies were raised at 25°C and 60% humidity on a 12/12 h light and dark cycle and maintained  
152 on standard medium containing cornmeal, molasses, yeast, and agar. For the experiments pre-  
153 sented here, we used the following *Drosophila melanogaster* strains: wild-type *Canton-S*  
154 ( $w^{CS}$ ), wild-type *Berlin* ( $w^{Berlin}$ ),  $w^{1118}$ , and  $w^{1118}, Tbh^{nM18}$  (Monastirioti et al., 1996). Flies  
155 were kindly provided by Dr. M. Leptin ( $w^{CS}$ ), Dr. R. Strauss ( $w^{Berlin}$ ), and Dr. H. Scholz  
156 ( $w^{1118}$  and  $w^{1118}, Tbh^{nM18}$ ).

157 *Experimental procedure*

158 For all experiments, five days old males were used. At least two hours prior to an experiment,  
159 flies were cold anesthetized and put into isolation tubes without food but with water. One fly  
160 at a time was then transferred from its isolation tube into the experimental setup where it  
161 walked spontaneously back and forth on a 5 mm wide transparent walkway (Fig. 1A). Wings  
162 were left intact; therefore, to prevent escape by flight, the walkway was enclosed on all sides  
163 with acrylic glass. Furthermore, the inner walls of the enclosure were covered with a layer of  
164 Fluon (AGC Chemicals Europe) which prevented the flies from scaling the walls. To allow  
165 for video recordings a small area (20 mm) on one side of the walkway was kept free of Fluon.  
166 Beneath this area, we attached a glass prism providing a ventral view of the walkway. Thus,  
167 using a single camera we were able to simultaneously record a lateral (Fig. 1B) and a ventral  
168 view (Fig. 1C) of the walking fly. Video recordings were taken with a high-speed digital cam-  
169 era (AOS S-PRI High Speed Color 5.2, AOS Technologies AG, Baden Daettwil, Switzerland)  
170 at 500 frames  $s^{-1}$ , with a shutter time of 200  $\mu s$ . The setup was illuminated with infrared LEDs  
171 ( $\lambda = 880$  nm). The LEDs were externally synchronized to the shutter of the camera in order to  
172 provide maximum illumination during the time the shutter of the camera was open. The cam-  
173 era was controlled via AOS Imaging Studio v3 (AOS Technologies AG, Baden Daettwil,  
174 Switzerland). After each set of experiments a 10mm wide marker was recorded with the same  
175 settings. This marker was then used to calibrate the analyzed videos.

176 For the amputation experiments, flies were cold anaesthetized followed by the removal of one  
177 of the hind legs. This was done by cutting off the leg at the midpoint of the femur, leaving  
178 only a stump consisting of coxa, trochanter, and part of the femur. Flies were then moved to  
179 isolation tubes and subsequently treated as described above for the intact animals.

180 To determine the average weight of the flies, between 9 and 35 flies (three to seven days old)  
181 of each sex and strain were collected into separate 1.5 ml plastic tubes (Table 1). The tubes  
182 including the flies were then weighed, the weight of the empty tube was subtracted, and the  
183 weight of one single fly was calculated. In addition, the body length of each fly recorded dur-  
184 ing the behavioral experiments was determined by marking the base of the antennae and the  
185 tip of the abdomen in the ventral view of the fly, using the same software as for the video  
186 analysis (ProAnalyst, XCitex, Inc., Cambridge, MA).

### 187 *Data analysis*

188 During experiments, flies walked spontaneously back and forth on the walkway. We recorded  
189 straight walks containing 5 to 12 complete step cycles per leg. The recorded videos were then  
190 evaluated frame-by-frame in a semi-automatic fashion. Body position and axes were deter-  
191 mined automatically with ProAnalyst (XCitex, Inc, Cambridge, MA). The exact times of tar-  
192 sal liftoff and touchdown events were visually determined in the lateral view of the fly, while  
193 the associated tarsus positions were visually determined in the ventral view. Data obtained in  
194 this manner were then further processed in MATLAB (MathWorks, Inc., Natick, MA).

195 Durations of swing and stance phases were calculated as the difference between the time of  
196 liftoff and subsequent touchdown of the same leg (swing) or vice versa (stance). One cycle  
197 period was defined as the time difference between two consecutive liftoff events of the same  
198 leg. Onset of swing was used as reference time for the analysis of temporal coordination of all  
199 legs. In trials with intact animals, the reference leg was always the front leg that completed  
200 the most cycles during a given trial. In trials with animals lacking one hind leg, the reference  
201 leg was always the front leg contralateral to the lesioned side. Results from the phase analysis  
202 of trials in which the right front leg was the reference leg were then flipped in order to com-  
203 bine the results with those in which the left front leg was the reference leg. Phase analyses and  
204 the corresponding plots were done using the CircStat Toolbox for MATLAB (Berens, 2009).

205 All positional information with regard to tarsal touchdown and liftoff was transformed into  
206 the body-centered XY-coordinate system (see also Fig. 1C). Furthermore, in order to compen-  
207 sate for small variations in body size, these body-centered data were then normalized to the  
208 respective body length of the fly. Based on these data we calculated stance trajectories in the  
209 body-centered XY-coordinate system. Step amplitude of a particular step was determined as  
210 the distance between the posterior extreme position (PEP) of the tarsus at liftoff and the sub-  
211 sequent touchdown at the anterior extreme position (AEP) in body-centered coordinates. It

212 has to be noted that we use step amplitude instead of stride length, which is defined as the  
213 distance between two consecutive touchdown positions in floor-fixed coordinates. Stride  
214 length is not independent of movement speed and might change even without active changes  
215 in the walking motor pattern. This is not true for step amplitude. A change in this measure  
216 always necessitates a change in the motor output. Although the two measures are closely re-  
217 lated, step amplitude is much more informative, when one is interested in kinematic changes  
218 the animal has to make actively.

219 Based on the ventral view, walking speed was calculated for each frame in a trial as the  
220 change in position of the fly's body relative to the ground. The resulting speed profile was  
221 smoothed with a gliding average of 5 frames width. Based on this complete speed profile, the  
222 walking speed associated with a particular swing phase, as used in Fig. 3B and 3D, for in-  
223 stance, was calculated as follows: we first determined the time interval between onset and  
224 offset of the swing phase and found the section of the complete speed profile associated with  
225 this interval. We averaged the speed profile within the interval to obtain a single average  
226 speed value. This average speed value was then used as the walking speed associated with a  
227 particular swing phase.

### 228 *Coordination patterns*

229 In hexapod walking, the literature typically distinguishes between three different coordination  
230 patterns: tripod coordination, tetrapod coordination and wave gait. The mere existence of  
231 these categories implies three distinct gaits, and, as a matter of fact, these coordination pat-  
232 terns have often been used synonymous with gaits. The literature, however, also implies that  
233 there is a speed-dependent continuum between these prominent patterns (Wendler, 1964;  
234 Graham 1972). Therefore, because they are established, we use these terms; however, we do  
235 so in a purely descriptive manner and refer to *coordination patterns* rather than *gaits*.

236 In order to describe the walking patterns that occurred during the recorded trials we classify  
237 these as either tripod, tetrapod, or undefined coordination according to the following consid-  
238 erations: *Tripod coordination* is described as the alternating movement of two distinct groups  
239 of legs (Hughes, 1952; Wilson, 1966). These *tripod groups* consist of an ipsilateral front and  
240 hind leg, and a contralateral middle leg (L1, L3, R2, and R1, R3, L2, respectively). Tripod  
241 coordination is typically found in fast moving animals and therefore constitutes the extreme  
242 case at the highest end of the aforementioned speed-dependent continuum. In its ideal form,  
243 tripod coordination is characterized as the simultaneous liftoff and touchdown of all legs in



244 one tripod group, while the legs associated with the other tripod group are on the ground.  
245 However, using this strict definition of tripod coordination is problematic, mainly because of  
246 two reasons. First of all, in this strict sense, tripod coordination occurs only very rarely; even  
247 during highly coordinated walking random fluctuations or small systematic shifts in the phase  
248 relations between legs of one tripod group tend to persist (Bender et al., 2011); in addition, it  
249 is known that in most insects the legs of one tripod group are not completely in phase  
250 (Hughes, 1952). Secondly, concentrating on this narrow aspect of inter-leg coordination po-  
251 tentially diverts attention from other interesting coordination patterns which do not happen to  
252 fall under the tripod definition but might nevertheless be highly regular. In order to address  
253 this conceptual problem, we used a more flexible description of tripod coordination: we de-  
254 fined a particular walking pattern as tripod coordination when, during one step, the swing  
255 phases of all legs associated with a tripod group concurrently overlapped for at least one  
256 frame of recorded video. Here, this is equivalent to 2 ms; for comparison, typical swing dura-  
257 tions observed during experiments were in the range of 20 to 40 ms. Note, that this is different  
258 from the strict definition of tripod coordination, which is defined as *simultaneous* liftoff and  
259 touchdown of the legs in a tripod group. In addition, once a walking pattern was defined as  
260 tripod, we determined the *tripod coordination strength* (TCS) which we obtained as follows.  
261 First, we calculated the time from the earliest swing onset to the latest swing termination. This  
262 gave us time  $t_1$ , during which at least one of the three legs was in swing phase. Then we de-  
263 termined time  $t_2$ , during which all three legs were in swing phase at the same time. The ratio  
264  $t_2/t_1$  then described the TCS. A TCS of 1 indicated perfect tripod coordination; it approached  
265 0 when the temporal relation of swing phases shifted to other coordination patterns (e.g. see  
266 Fig. 7G). *Tetrapod coordination* was defined accordingly: it can be defined as a walking pat-  
267 tern in which exactly two legs are lifted off the ground at a particular time (Graham, 1985;  
268 Hughes, 1952). Therefore, a walking pattern was defined as tetrapod when, during one step,  
269 the swing phases of exactly two legs overlapped for at least one frame of recorded video. Te-  
270 trapod coordination constitutes a further special case within the continuum of coordination  
271 and is generally associated with intermediate walking speeds. Finally, when a step was neither  
272 tripod nor tetrapod we classified it as *undefined*. This category is largely identical with what is  
273 usually called *wave gait*, although this was not explicitly tested. It has to be noted, that we  
274 used this classification schema on a step-by-step basis; each step was evaluated separately and  
275 can either be classified as tripod, tetrapod, or undefined, never as two of the above. Although  
276 tripod coordination was predominantly found at high speeds, tetrapod coordination was most  
277 frequently found at intermediate speeds, and undefined coordination was most common at low

278 speeds, the classification was completely agnostic with regard to the walking speed during a  
279 particular step. Each coordination class could have occurred at any speed.

280

281 **Results**

282 The four different strains of *Drosophila* studied here were similar in size and weight (Table  
283 1). The body lengths of males ranged from 2.06 to 2.12 mm, their weight ranged from 0.70 to  
284 0.86 mg. In general, the weight of females was higher, ranging from 1.05 to 1.32 mg. Males  
285 of the strains  $wt^{CS}$ ,  $w^{1118}$ , and  $w^{1118}$ ,  $Tbh^{nM18}$  were almost identical in size and weight, while  
286  $wt^{Berlin}$  males were slightly larger (5%) and on average 20% heavier. The same was true for  
287 females of  $wt^{Berlin}$ . In order to minimize potential age- or sex-related influences on walking  
288 behavior we selected five day old males for the present study.

289 Wild-type strain *Canton-S* ( $wt^{CS}$ )

290 In a first set of experiments, we studied leg kinematics and inter-leg coordination in  $wt^{CS}$  dur-  
291 ing spontaneous walking. Generally, animals generated walking sequences that were straight  
292 and the features of which were in accordance with previously published findings (Strauss and  
293 Heisenberg, 1990; Strauss and Heisenberg, 1993). Legs were coordinated in tripod fashion, as  
294 exemplified in the trial displayed in Figure 2Ai (highlighted area). The features of all further  
295 recorded trials of  $wt^{CS}$  were qualitatively similar to the one shown in Fig. 2Ai. Movement  
296 speed was always relatively constant during each trial; in the sequence shown in Fig. 2Ai, for  
297 instance, movement speed was approx. 13 body lengths per second ( $BL s^{-1}$ ) on average. How-  
298 ever, over all trials, average walking speed ranged from 5 to 16  $BL s^{-1}$ . This was equivalent to  
299 absolute values of 11 to 32 mm/s (6 individuals; 555 steps). Average stance phase trajectories  
300 of all six legs were relatively straight and almost parallel to the longitudinal body axis (Fig.  
301 2B). The length of stance trajectories was similar for all legs and in the range of half the body  
302 length. With regard to temporal coordination, each of the three leg pairs showed anti-phase  
303 swing activity on average (Fig. 2C). Legs were generally coordinated in tripod fashion; how-  
304 ever, the front leg of a tripod group tended to initiate its swing phase first, followed by the  
305 middle leg with a phase shift of approx.  $15^\circ$ . The middle leg was in turn followed by the hind  
306 leg with a further phase shift of  $15^\circ$  (Fig 2C).

307 Only during particularly slow walking sequences tripod coordination was more variable. An  
308 example for this is shown in Fig. 2Aii. Here, a section of 0.5s from one of the slower trials in  
309  $wt^{CS}$  is shown (approx. 7  $BL s^{-1}$  on average). However, even during these slowest walking  
310 sequences coordination was still tripod, according to our conservative definition (see hig-  
311 hlighted area in Fig. 2Aii), and phase relations were similar to those of the faster trials (Fig.  
312 2C, green points). In contrast to a tripod group, in which the temporal succession of swing

313 onset was directed posteriorly, the order of swing onsets on each body side was always di-  
314 rected anteriorly, beginning with the hind leg, followed by the middle leg and finally the front  
315 leg, after which the next series starts again with the hind leg.

316 As it is known that insects walking in tripod coordination adapt swing duration depending on  
317 step cycle period (Graham, 1985), we examined this relationship for  $wt^{CS}$ . We found that  
318 swing duration indeed moderately correlated with cycle period (Fig. 3A); this was true for the  
319 complete data set (Fig. 3A, black regression line, coefficient of determination  $R^2 = 0.37$ ), as  
320 well as for individual trials (Fig. 3A, gray regression lines). Another parameter that more  
321 strongly depended on cycle period was walking speed; we modeled this dependence as a  
322 hyperbolic relationship over the complete range of cycle periods (Fig. 3B, black line, pseudo  
323  $R^2 = 0.76$ ). At the same time, cycle period did not correlate with step amplitude (Fig. 3C,  
324 black regression line,  $R^2 = 0.03$ ). Although step amplitude contributes weakly to walking  
325 speed when we examine the complete range of step amplitudes (Fig. 3D, black regression  
326 line,  $R^2 = 0.16$ ), this relation cannot be shown reliably for individual trials (Fig. 3D, gray re-  
327 gression lines).

328 Wild-type strain *Berlin* ( $wt^{Berlin}$ )

329 We then collected data for the  $wt^{Berlin}$  (Fig. 4). Similar to  $wt^{CS}$  flies,  $wt^{Berlin}$  almost exclusively  
330 used tripod coordination during all recorded trials. As an example for comparatively strict  
331 tripod leg coordination in this strain, Figure 4Ai shows a 0.5s long section of a fast walking  
332 trial. Overall, average walking speed ranged from 5 to 15 BL  $s^{-1}$ , which was equivalent to  
333 absolute speeds of 11 to 34 mm  $s^{-1}$  (3 individuals; 403 steps). Stance trajectories in the  $wt^{Berlin}$   
334 were on average straight and almost parallel to the longitudinal body axis (Fig. 4B). Each of  
335 the three leg pairs showed clear anti-phase swing activity during tripod coordination (Fig.  
336 4Ai; highlighted area; Fig. 4C; magenta points for the sequence shown in Fig. 4Ai). In analo-  
337 gy to  $wt^{CS}$ , we found that the front legs of a tripod group initiated swing first, followed by the  
338 middle legs, which in turn were followed by the hind legs (Fig. 4C, blue data points). Only  
339 during very slow walking sequences, tripod coordination became more variable and we also  
340 found intermittent tetrapod coordination (Fig. 4Aii; highlighted area); this was also reflected  
341 in the phase relations which started to deviate more pronouncedly from the typical tripod pat-  
342 tern (Fig. 4C, green data points). These shifts to tetrapod coordination were rare though (see  
343 also Fig. 7A). The succession of swing onset on each body side was always directed anterior-  
344 ly. In analogy to  $wt^{CS}$ , walking speed in  $wt^{Berlin}$  was clearly correlated with cycle period (Fig.  
345 4D), while it did not depend on step amplitude (Fig. 4E).

346 Mutant strain *white*<sup>1118</sup> (*w*<sup>1118</sup>)

347 In the third set of experiments, we analyzed walking in *w*<sup>1118</sup> flies (Fig. 5). The total range of  
348 walking speeds in this strain was similar to those of *w*<sup>CS</sup> and *w*<sup>Berlin</sup> flies, with values ranging  
349 from 2 to 15 BL s<sup>-1</sup>, i.e. from 4 to 31 mm/s (5 individuals; 695 steps), as exemplified for a  
350 single trial in Fig. 5Ai. However, *w*<sup>1118</sup> flies walked at lower speeds more frequently. In gen-  
351 eral, speed appeared to be somewhat more variable within single walking sequences as com-  
352 pared to *w*<sup>CS</sup> and *w*<sup>Berlin</sup> (cf. Figs. 2A and 4A to 5A). Stance trajectories were parallel to the  
353 longitudinal body axis for all three pairs of legs. On average, step amplitudes were slightly  
354 shorter than 0.5 body lengths and thus shorter than for the other two strains (Fig. 5B). Indi-  
355 viduals of *w*<sup>1118</sup> often used tripod coordination (e.g. Fig. 5Ai; see highlighted area), although  
356 the variability of inter-leg coordination seemed to be relatively high (blue points in Fig. 5C; 5  
357 individuals; 713 steps). Nevertheless, according to our conservative definition inter-leg coor-  
358 dination was still tripod on average (black lines in Fig. 5C). This variability can partially be  
359 attributed to the fact that at lower speeds animals no longer used tripod but instead used tetra-  
360 pod coordination (Fig. 5Aii; highlighted area with one asterisk) or even wave gait-like coor-  
361 dination (Fig. 5Aii; highlighted area with two asterisks). Similar to *w*<sup>CS</sup> and *w*<sup>Berlin</sup> flies aver-  
362 age swing phase onset of posterior legs in a tripod group trailed front legs (Fig. 5C, magenta  
363 points for the trial in Fig. 5Ai; blue points for all data). Still, even in the slowest trial the suc-  
364 cession of swing phase onsets on a body side was directed anteriorly. The walking speed of  
365 *w*<sup>1118</sup> flies strongly correlated with cycle period (Fig. 5D). We found only a weak correlation  
366 between walking speed and step amplitude (Fig. 5E, R<sup>2</sup> = 0.17).

367 Mutant strain *w*<sup>1118</sup>, *Tbh*<sup>nM18</sup>

368 The octopaminergic neurotransmitter system has been implicated in the regulation of walking  
369 in stick insects, cockroaches, and crabs. *w*<sup>1118</sup>, *Tbh*<sup>nM18</sup> mutants lacking the enzyme tyramine-  
370 b-hydroxylase enzyme necessary for the conversion of tyramine into octopamine have defi-  
371 ciencies in locomotor performance as compared to wild-type flies (Brembs et al., 2007;  
372 Scholz, 2005). We found that this offered the chance to extend the range of movement speeds  
373 studied here to even lower values. For *w*<sup>1118</sup>, *Tbh*<sup>nM18</sup> flies movement speed ranged from 3  
374 mm/s to 14 mm/s (5 individuals; 681 steps), i.e. from 1.5 to 7 BL s<sup>-1</sup>. *w*<sup>1118</sup>, *Tbh*<sup>nM18</sup> flies only  
375 rarely walked at higher speeds as exemplified for a single trial in Fig. 6Ai (see highlighted  
376 area for an instance of tripod coordination). Again, average stance trajectories were parallel to  
377 the longitudinal body axis and were slightly shorter than those in the strain *w*<sup>1118</sup> (Fig. 6B).  
378 However, average phase relations of swing onset were no longer typical for tripod coordina-

379 tion: for example, phase values for R1, L2 and R3 relative to L1 were  $175^\circ$ ,  $120^\circ$  and  $140^\circ$ ,  
 380 respectively. Phase plots show a substantial variability of inter-leg coordination (Fig. 6C; ma-  
 381 genta points for the sequence shown in Fig. 6Ai; blue points for all steps; 5 individuals; 713  
 382 steps). At low speeds ( $< 5 \text{ BL s}^{-1}$ )  $w^{1118}$ ,  $Tbh^{nM18}$  flies often used tetrapod coordination; during  
 383 the slowest trials (2 to  $3 \text{ BL s}^{-1}$ ) coordination resembled wave gait (Fig. 6Aii: see highlighted  
 384 areas: \* tetrapod; \*\* wave gait-like coordination; green points of this sequence in Fig. 6C). In  
 385 analogy to the other strains examined here, the succession of swing onset on each body side is  
 386 directed anteriorly. Only small deviations from this pattern could be observed during very  
 387 slow trials (cf. third swing of R3 in Fig. 6Aii). Again, walking speed in  $w^{1118}$ ,  $Tbh^{nM18}$  was  
 388 strongly correlated to cycle period (Fig. 6D). The correlation between walking speed and step  
 389 amplitude was weak (Fig. 6E,  $R^2 = 0.15$ ).

### 390 *Inter-leg coordination depends on movement speed*

391 While all strains used tripod coordination during fast walking, at lower speeds inter-leg coor-  
 392 dination became more variable or changed to other patterns such as tetrapod coordination.  
 393 Based on this observation, we wanted to know whether inter-leg coordination depends syste-  
 394 matically on walking speed. Therefore, we first determined the relative frequency of occur-  
 395 rence of tripod, tetrapod, and undefined coordination in all four fly strains. We found that  $wt^{CS}$   
 396 and  $wt^{Berlin}$  flies almost exclusively used tripod coordination, while in  $w^{1118}$  and  $w^{1118}$ ,  $Tbh^{nM18}$   
 397 flies tetrapod and undefined coordination patterns represented almost one third of all patterns  
 398 (Fig. 7A). When we pooled the data of all strains and plotted the relative frequency of occur-  
 399 rence of coordination types in three different speed ranges we found that tetrapod and unde-  
 400 fined coordination patterns occur almost exclusively at speeds below  $5 \text{ BL s}^{-1}$  (Fig. 7B). Be-  
 401 cause we chose a rather conservative tripod definition, we frequently found this coordination  
 402 type in all four strains. To further flesh out the relation between tripod coordination and walk-  
 403 ing speed we examined the tripod coordination strength (TCS) as a function of speed in all  
 404 four strains (Fig. 7C:  $wt^{CS}$ ; Fig. 7D:  $wt^{Berlin}$ ; Fig. 7E:  $w^{1118}$ ; Fig. 7F:  $w^{1118}$ ,  $Tbh^{nM18}$ ). Figure 7G  
 405 shows five exemplary footfall patterns illustrating TCS ranging from 0.8 to 0.1. Generally, in  
 406 all four strains TCS was variable, but depended systematically on movement speed. While we  
 407 did not expect TCS to reach 1.0 due to the aforementioned phase lags within a tripod group, at  
 408 speeds higher than  $10 \text{ BL s}^{-1}$  it reached maximal values of up to 0.85 (cf. Fig. 7G). Below  $10$   
 409  $\text{BL s}^{-1}$  TCS ranged from values 0.02 to 0.8. In general, at speeds higher than  $10 \text{ BL s}^{-1}$  inter-  
 410 leg coordination is tripod. Its variability increases noticeably towards lower speeds, as indi-

411 cated by lower TCS values. In the range of low walking speeds ( $<10 \text{ BL s}^{-1}$ ) *Drosophila*  
412 seems to be able to also use tetrapod coordination or even wave gait.

### 413 *Inter-leg coordination changes after loss of one hind leg*

414 The results presented here suggest that *Drosophila*'s walking system does not generate a fixed  
415 motor output. Instead, it seems to be able to flexibly produce inter-leg coordination patterns  
416 which change in a systematic and gradual fashion with walking speed. At very slow walking  
417 speeds, *Drosophila* uses wave gait; with an increase in speed, inter-leg coordination then tran-  
418 sitions to tetrapod and finally becomes tripod at the highest speeds. In order to further study  
419 the basis of this apparent flexibility, in a final set of experiments we examined walking in *wt*<sup>CS</sup>  
420 flies shortly after the removal of one hind leg (Fig. 8). The loss of a leg drastically changes  
421 the body geometry and if the animal wants to continue walking successfully it has to adapt its  
422 movement pattern to this new geometry. One necessary prerequisite for such an adaptation is  
423 that sensory information originating in the legs is taken into account by the neural system that  
424 generates walking behavior.

425 We observed five changes in the walking behavior of flies after the loss of one hind leg: (i)  
426 *wt*<sup>CS</sup> flies with a missing hind leg walked on average slower than intact animals of the same  
427 strain (Fig. 8 A; cf. Fig. 2 A). Average walking speeds ranged from 1 to 13  $\text{BL s}^{-1}$ , which is  
428 equivalent to approx. 2 to 26 mm/s (5 individuals; 664 steps), as compared to a range of 4 to  
429 18  $\text{BL s}^{-1}$  in intact animals. (ii) The shape of stance trajectories changed after amputation of  
430 one hind leg and showed distinct curvatures. (iii) In all legs, AEPs and PEPs changed within  
431 the body coordinate system (Fig. 8B). Generally, we found an outward shift of AEPs and  
432 PEPs. In addition, especially in the remaining middle and hind legs these positions were also  
433 shifted caudally. (iv) The average stance trajectories of the remaining hind leg and of both  
434 middle legs became noticeably longer. Stance trajectory length increased in the remaining  
435 hind leg from 0.43 to 0.47 BL, and in middle leg contralateral to the lesion from 0.50 to 0.53  
436 BL. The most noticeable increase was found in the middle leg ipsilateral to the lesion. Here,  
437 average stance trajectory length increased from 0.50 to 0.60 BL. (v) Phase relations of both  
438 the contralateral middle and the remaining hind leg were altered. The hind leg contralaterally  
439 to the lesion (leg I3) was, on average, no longer in phase with the ipsilateral middle leg (C2);  
440 it increased its phase with regard to I3 to 0.85 rad (Fig. 8C) as compared to the intact animal  
441 in which the phase of C2 with regard to I3 was 0.16 on average (Fig. 2C). Furthermore, the  
442 contralateral middle leg showed an increase in phase with regard to the contralateral front leg  
443 (Fig. 8 C, cf. with Fig. 2C). As a consequence, generally three to four legs were simultaneous-

444 ly on the ground. Slow walking individuals used either tetrapod or wave gait coordination  
445 (Fig. 8Aii). The correlation between walking speed and cycle period was still present though,  
446 and step amplitude was not correlated with speed (Figs. 8D and E).

447



448 **Discussion**

449 We have shown that the walking system of *Drosophila* is able to generate a broad range of  
450 locomotion speeds and different strains walked at preferred parts of this complete range.  $w^{CS}$   
451 flies tended to walk faster than  $w^{Berlin}$  and  $w^{1118}$  individuals, respectively. Mutant  $w^{1118}$ ,  
452  $Tbh^{nM18}$  individuals walked at the lowest speeds. At high speeds, all individuals walked in  
453 tripod coordination. With decreasing walking speed, TCS decreased as well (Fig. 7C to F) and  
454 animals also used tetrapod coordination more frequently (Fig. 7B). Finally, at very low  
455 speeds, walking was often accomplished by simultaneous stance phases of five legs while  
456 only a single leg is in swing phase at a time. These findings imply that *Drosophila's* walking  
457 behavior is more flexible than previously thought (Strauss and Heisenberg, 1990): there are  
458 no clearly separable gaits and, more specifically, the neural controller producing inter-leg  
459 coordination is not restricted to a fixed tripod pattern.

460 This notion is substantiated by amputation experiments, in which we examined the walking  
461 behavior of animals after the loss of one hind leg. These experiments were carried out with  
462 individuals of  $w^{CS}$ , which is the strain that showed the most robust tripod coordination when  
463 intact. Removal of a hind leg in these flies resulted in an immediate reorganization of overall  
464 posture, single leg kinematics and inter-leg coordination: the legs of the animals were posi-  
465 tioned in a broader frame, the stance trajectories of the remaining middle and hind legs were  
466 elongated while the phase of these legs was increased.

467 *Changes in inter-leg coordination related to walking speed*

468 In the first part of the present study we have analyzed walking in the *Drosophila* strains  $w^{CS}$   
469 and  $w^{Berlin}$  as well as the mutant strains  $w^{1118}$  and  $w^{1118}$ ,  $Tbh^{nM18}$  with respect to single leg  
470 kinematics and inter-leg coordination. Walking speed differed noticeably between strains,  
471 with  $w^{CS}$  and  $w^{Berlin}$  ranging from 5 to 16 BL s<sup>-1</sup> (11 to 32 mm/s),  $w^{1118}$  ranging from 2 to 15  
472 BL s<sup>-1</sup> (3.5 to 31 mm/s), and  $w^{1118}$ ,  $Tbh^{nM18}$  ranging from 1.5 to 7 BL s<sup>-1</sup> (3 to 14 mm/s). For  
473 the strains  $w^{CS}$  and  $w^{Berlin}$ , the reported average walking speeds in the literature range from  
474 2.2 and 2 to 3 mm/s (Serway et al., 2009) to 15 and 21 mm/s (Poeck et al., 2008; Strauss and  
475 Heisenberg, 1993), respectively. Average walking speed for  $w^{1118}$  was reported to be approx.  
476 2 mm/s and for  $w^{1118}$ ,  $Tbh^{nM18}$  4 mm/s (Scholz, 2005). More detailed data concerning the  
477 range of walking speeds are only available for the strain  $w^{Berlin}$ , for which speeds of 12 to 40  
478 mm/s were found (Strauss and Heisenberg, 1990). These values correspond with our data in  
479 which we find only slightly lower speeds for  $w^{Berlin}$  (11 - 34 mm/s). It has to be noted though

480 that we used a different behavioral paradigm than previous studies. Some of these used Buri-  
481 dan's paradigm (Bülthoff et al., 1982; Götz, 1980) to elicit straight walks on level ground  
482 (Poeck et al., 2008; Serway et al., 2009; Strauss and Heisenberg, 1990; Strauss and  
483 Heisenberg, 1993), while others studied walking in *Drosophila* under ambient light conditions  
484 without the presentation of visual cues (Scholz, 2005; Wolf et al., 2002).

485 For all strains examined here we found that walking speed is controlled via changes in step  
486 cycle period and stance duration. Over the complete range of walking speeds we found only  
487 moderate changes with regard to swing duration, and no systematic modification of step am-  
488 plitude could be detected. This complements and extends a previous study in which *Drosophi-*  
489 *la* altered not only its cycle period but also its stride length over the range of walking speeds  
490 (Strauss and Heisenberg, 1990). These authors, however, examined stride length, while the  
491 present study focused on step amplitude (see also Materials and Methods section). The find-  
492 ings presented here do not contradict the previous ones; here, however, we wanted to disso-  
493 ciate the effect body translation during swing phases has on stride length from actual adapta-  
494 tions in leg kinematics during a step cycle. As a consequence, our findings indicate that *Dro-*  
495 *sophila* controls walking speed solely by adjusting step cycle period while it keeps step ampli-  
496 tude mostly constant.

497 Strauss and Heisenberg (1990) reported that *Drosophila* uses tripod coordination for a large  
498 part of the observed speed range. They found tetrapod coordination only during "... decelera-  
499 tion episodes prior to turns or to a complete stop,...". In general, we can confirm these find-  
500 ings. However, in the present study *Berlin* flies also spontaneously generated relatively slow  
501 walking bouts. In these trials we found that inter-leg coordination deviated from a strong tri-  
502 pod pattern, as indicated by low TCS values. Comparing this result with the data for *wt*<sup>CS</sup> and  
503 *w*<sup>1118</sup> revealed that this change in coordination is indeed systematically found when *Drosophi-*  
504 *la* walks more slowly. At walking speeds higher than 10 BL s<sup>-1</sup> inter-leg coordination was  
505 always tripod. At lower speeds, TCS decreased and within this speed domain we also ob-  
506 served tetrapod coordination. This analysis suggests that the kinematics of the movement pat-  
507 tern generally change systematically and continuously with walking speed.

508 It is important to emphasize what a decrease in TCS means with regard to inter-leg coordina-  
509 tion: a TCS of 0.5 means that the swing phases of the legs associated with a tripod group  
510 overlap 50% of the time during which any of these legs move. For a TCS of 0.4 this decreases  
511 to 40%; however, this also means that during 60% of the time these legs are not in swing  
512 phase simultaneously. In other words, during this time four or five legs are on the ground.

513 This time only increases with a further decrease in TCS. Consequently, although low TCS  
514 levels still indicate tripod coordination (according to our conservative definition), swing phase  
515 overlap in these cases might be more consistent with coordination patterns that conventionally  
516 have rather been associated with tetrapod coordination. In addition, examining the two mutant  
517 strains  $w^{1118}$  and  $w^{1118}, Tbh^{nM18}$  shows that at very low walking speeds *Drosophila* no longer  
518 uses tetrapod and instead coordinates its legs in a pattern that resembles wave gait, a pattern  
519 first described for larger insects (Hughes, 1952; Wilson, 1966).

520 Interestingly, it appears that inter-leg coordination in *Drosophila* reflects all possible coordi-  
521 nation patterns known in insects. Studies on inter-leg coordination in other, much larger in-  
522 sects, including cockroaches and beetles (Hughes, 1952), or grasshoppers (Burns, 1973),  
523 showed that inter-leg coordination is tripod only at high walking speeds and short cycle pe-  
524 riods. At lower speeds inter-leg coordination becomes increasingly variable, including tetra-  
525 pod walking patterns. However, in these studies the examined species often differed noticea-  
526 bly in size and weight. Burns (1973), for instance, studied two orthopteran species, locusts  
527 and grasshoppers, which differed in size by a factor of two. With respect to a systematic anal-  
528 ysis of inter-leg coordination and walking speed previous insights derive from studies on ants  
529 (Zollikofer, 1994), cockroaches (Delcomyn, 1971), and stick insects (Graham, 1985;  
530 Wendler, 1966). Freely walking ants predominantly use tripod coordination in a speed range  
531 between 5 and 32 BL s<sup>-1</sup>; no data, however, is available for slower walking speeds. Unre-  
532 strained cockroaches walk at speeds in the range of 1 to 20 BL s<sup>-1</sup> (Bender et al., 2011;  
533 Delcomyn, 1971) and it has been reported that tripod coordination is present across a broad  
534 range of speeds, i.e. above 1.2 BL s<sup>-1</sup>. However, inter-leg coordination in cockroaches be-  
535 comes more variable with slower speeds. Delcomyn (1971) used the term “uncoupled alter-  
536 nating triangle” for the increasing variability in tripod coordination occurring at slow speeds  
537 (Kozacik, 1981). Bender and coworkers (2011) also reported clear changes in inter-leg coor-  
538 dination related to walking speed. They proposed the term *ambling gait* for inter-leg coordina-  
539 tion that is found during slow walking. It is important to note that although cockroaches tend  
540 to move the legs of a tripod group simultaneously at low speeds the coordination pattern be-  
541 comes much more variable and there does not seem to be a fixed coupling anymore. When  
542 adult stick insects walk on a level surface they mostly do so at speeds well below 1 BL s<sup>-1</sup>; in  
543 this situation their preferred inter-leg coordination is tetrapod (Cruse et al., 2009; Graham,  
544 1972). At higher speeds sequences of tripod coordination can also be observed (Graham,  
545 1972). Our results on *Drosophila* show two things: firstly, as it has been found in the stick  
546 **insect**, inter-leg coordination in *Drosophila* is not fixed, but changes systematically and grad-

547 ually as a function of walking speed over a broad speed range. Secondly, below walking  
548 speeds of 5 to 6 BL s<sup>-1</sup>, *Drosophila* seems to be able to choose which coordination type it uses  
549 and can walk in tripod, tetrapod, or even wave gait-like inter-leg coordination. Importantly,  
550 we found that swing duration was uncorrelated with walking speed. These findings have im-  
551 plications for the organization of the neural structure controlling walking in *Drosophila*: there  
552 is no justification to hypothesize a specific neural tripod generator in *Drosophila*.

553 This conclusion is corroborated by the changes observed in inter-leg coordination following  
554 the loss of one hind leg in *wt<sup>CS</sup>*, which is the strain that had the most robust tripod coordina-  
555 tion pattern. We found that inter-leg coordination as well as stance kinematics changed after  
556 the loss of one hind leg (Fig. 8). In the present study, compensatory changes were observed on  
557 two different levels: the temporal and the kinematic level. With regard to temporal coordina-  
558 tion, the stepping activity of the remaining legs, specifically the contralateral middle and hind  
559 legs, was modified such that the now absent support of the missing hind leg was compensated.  
560 Swing phase activity in the contralateral hind and middle legs was delayed as compared to an  
561 intact animal. Kinematic changes entail an extended stance trajectory in the ipsilateral middle  
562 leg and a general outward shift of AEPs and PEPs, i.e. overall, the animal adopts a broader  
563 posture. Especially, this outward shift suggests an overall compensatory modification of body  
564 posture. In addition, the extended stance trajectory of the ipsilateral middle leg nicely corres-  
565 ponds to Cruse's coordination rule 1 (Cruse et al., 1998; Dürr et al., 2004). This rule ensures  
566 that a leg in swing phase inhibits the transition to swing phase in an anterior neighbor. Since  
567 the amputated leg in the present study can be interpreted as locked in swing phase this would  
568 explain the extended stance phase in the ipsilateral middle leg. These findings are interesting  
569 as it provides evidence for cooperative interactions (neural and mechanical) between the legs  
570 in the generation of propulsion and posture. Similar changes in inter-leg coordination after the  
571 loss of one leg have been reported for stick insects (Bässler, 1972; Graham, 1977) and cock-  
572 roaches (Delcomyn, 1991; Hughes, 1957). Hughes (1957), for instance, found in cockroaches  
573 that upon removal of one hind leg other legs have extended stance trajectories and that stance  
574 trajectories are shifted outward. Our results also parallel findings reported by Delcomyn  
575 (1991), who showed that inter-leg coordination during walking became more variable after  
576 the loss of one hind leg (cf. Fig. 2C with 8C). We have to note, however, that the postural  
577 adaptations we observed, especially the broader placement of the tarsi, might at least in part  
578 be due to a relative increase in load, a consequence of the loss of muscle force available to the  
579 animal.

580 Based on the changes in inter-leg coordination with regard to walking speed and upon removal of one leg, we conclude that the neural control system for walking in *Drosophila* allows for  
581 a modular control of single-leg stepping in which individual legs are largely independent of  
582 each other and are only loosely coupled. We hypothesize that the neural control system for  
583 walking in *Drosophila* is similar to that in fast walking insects, like ants and cockroaches, as  
584 well as to that found in insects like the stick insect. The behavior of *Drosophila* agrees well  
585 with that found in stick insects (see Introduction). Behavioral studies in stick insects suggest  
586 that inter-leg coordination is the result of the interplay of individual leg controllers based on  
587 specific rules (Cruse, 1990; Dürr et al., 2004). Although not (yet) studied in *Drosophila*, it is  
588 quite conceivable that the 'coordination rules 1-3', as proposed by Cruse (Dürr et al., 1990),  
589 would suffice to generate the walking behavior observed here. However, it also needs to be  
590 taken into account that the output of any locomotor system is shaped by the complex interaction  
591 between neural as well as mechanical influences. In order to further substantiate how  
592 *Drosophila's* walking system compares to that of other insects it will be necessary to distinguish  
593 between the level of neural control and the level of mechanical coupling. Experimental  
594 paradigms for insect locomotion are available that allow for this dissection, e.g. slippery surfaces  
595 that reduce or even remove mechanical coupling between the legs (Graham and Cruse,  
596 1981; Gruhn et al., 2006).

598 Another interesting aspect of the present study are the results for the two mutant strains  $w^{1118}$   
599 and  $w^{1118}, Tbh^{nM18}$ . Both of these strains exhibited walking speeds that were lower than in the  
600 two wild-type strains, a fact that allowed us to extend the range of speeds that we investigated.  
601 Walking speed in  $w^{1118}, Tbh^{nM18}$  was lower than in  $w^{1118}$ . It is quite conceivable that  
602  $w^{1118}$  flies walk slower because of visual impairment (Kalmus, 1943). The even lower speed  
603 range used by  $w^{1118}, Tbh^{nM18}$  can likely be attributed to the fact that  $w^{1118}, Tbh^{nM18}$  lacks octopamine  
604 (Monastirioti et al., 1996), a biogenic amine that plays an important role during various locomotor  
605 behaviors in invertebrates. It is known to influence the initiation and maintenance of flight  
606 (Brembs et al., 2007) and pre-flight jumps in *Drosophila* (Zumstein et al., 2004)  
607 and is also implicated as a modulator of walking behavior in cockroaches, for instance (Gal  
608 and Libersat, 2008; Gal and Libersat, 2010). Interestingly, in all of these studies octopamine  
609 appears to selectively influence high-level aspects of locomotion, while more low-level aspects,  
610 such as leg kinematics, for instance, remain unaffected. Although the present study did  
611 not focus specifically on the effects of octopamine, we can support the findings of these previous  
612 works. Individuals of the  $w^{1118}, Tbh^{nM18}$  strain walked noticeably slower and less frequently,  
613 while inter-leg coordination and kinematics seemed to be very similar to  $w^{1118}$ . It is

614 important to note that these low octopamine levels might only explain reduced walking speed  
615 in  $w^{1118}$ ,  $Tbh^{nM18}$ . While  $w^{1118}$  also has reduced levels of other biogenic amines like dopamine  
616 and serotonin (Sitaraman, 2008), its octopamine levels are similar or only very slightly re-  
617 duced (Sitaraman et al., 2008; Yarali et al., 2009). Modifying the octopamine levels might be  
618 useful in future studies in order to specifically modulate the walking behavior in *Drosophila*  
619 mainly with regard to movement speed.

620

621 Acknowledgements

622 The authors thank H.-P. Bollhagen and S. Seyed-Nejadi for excellent technical assistance.  
623 The authors are grateful to H. Cruse, A. ElManira, S. Grillner, M. Gruhn, S.L. Hooper, H.-J.  
624 Pflüger, and J. Schmidt for various comments and discussions with regard to the manuscript  
625 and to O. Hendrich and M. Ruppert for their help with animal care. AB is grateful for the hos-  
626 pitality of Drs. Scholz, Wolf and Heisenberg during his sabbatical leave at the University of  
627 Würzburg in spring 2009, where he had the opportunity to be introduced to *Drosophila* as an  
628 animal model.

629

630 Funding

631 This work was supported by the German Research Foundation [grant numbers 857/10,11 to  
632 AB] and by the German Research Foundation Heisenberg Programme [Scho 656/7-1 to HS].

633

References

634

635

636 **Alexander, R. M.** (1989). Optimization and gaits in the locomotion of vertebrates.  
637 *Physiol. Rev.* **69**, 1199-227.

638 **Bässler, U.** (1972). Zur Beeinflussung der Bewegungsweise eines Beines von  
639 *Carausius morosus* durch Amputation anderer Beine. *Biol. Cybern.* **10**, 110-114.

640 **Bender, J. A., Simpson, E. M., Tietz, B. R., Daltorio, K. A., Quinn, R. D. and**  
641 **Ritzmann, R. E.** (2011). Kinematic and behavioral evidence for a distinction between trotting  
642 and ambling gaits in the cockroach *Blaberus discoidalis*. *J. Exp. Biol.* **214**, 2057-64.

643 **Berens, P.** (2009). CircStat: A MATLAB Toolbox for Circular Statistics. *J. Stat.*  
644 *Softw.* **31**, 1-21.

645 **Borgmann, A., Hooper, S. L. and Buschges, A.** (2009). Sensory feedback induced  
646 by front-leg stepping entrains the activity of central pattern generators in caudal segments of  
647 the stick insect walking system. *J. Neurosci.* **29**, 2972-83.

648 **Brembs, B., Christiansen, F., Pflüger, H. J. and Duch, C.** (2007). Flight Initiation  
649 and Maintenance Deficits in Flies with Genetically Altered Biogenic Amine Levels. *J.*  
650 *Neurosci.* **27**, 11122-11131.

651 **Bülthoff, H., Götz, K. G. and Herre, M.** (1982). Recurrent inversion of visual  
652 orientation in the walking fly, *Drosophila melanogaster*. *J. Comp. Physiol. A.* **148**, 471-481.

653 **Burns, M. D.** (1973). The Control of Walking in Orthoptera. I. Leg Movements in  
654 Normal Walking. *J. Exp. Biol.* **58**, 45-58.

655 **Büschges, A., Schmitz, J. and Bässler, U.** (1995). Rhythmic patterns in the thoracic  
656 nerve cord of the stick insect induced by pilocarpine. *J. Exp. Biol.* **198**, 435-56.

657 **Cruse, H. and Epstein, S.** (1982). Peripheral Influences on the Movement of the Legs  
658 in a Walking Insect *Carausius Morosus*. *J. Exp. Biol.* **101**, 161-170.

659 **Cruse, H.** (1990). What mechanisms coordinate leg movement in walking arthropods?  
660 *Trends Neurosci.* **13**, 15-21.

661 **Cruse, H., Kindermann, T., Schumm, M., Dean, J. and Schmitz, J.** (1998).  
662 Walknet-a biologically inspired network to control six-legged walking. *Neural Networks* **11**,  
663 1435-1447.

664 **Cruse, H., Dürr, V., Schilling, M. and Schmitz, J.** (2009). Principles of Insect  
665 Locomotion. In *Spatial temporal patterns for action-oriented perception in roving robots*,  
666 eds. P. Arena and L. Patanè), pp. 43 - 96. Berlin: Springer.



667 **Delcomyn, F.** (1971). Locomotion of Cockroach *Periplaneta Americana*. *J. Exp. Biol.*  
668 **54**, 443-&.

669 **Delcomyn, F.** (1991). Perturbation of the motor system in freely walking cockroaches.  
670 I. Rear leg amputation and the timing of motor activity in leg muscles. *J. Exp. Biol.* **156**, 483-  
671 502.

672 **Dürr, V., Schmitz, J. and Cruse, H.** (2004). Behaviour-based modelling of hexapod  
673 locomotion: linking biology and technical application. *Arthropod Struct. Dev.* **33**, 237-50.

674 **Full, R. J. and Tu, M. S.** (1991). Mechanics of a rapid running insect: two-, four- and  
675 six-legged locomotion. *J. Exp. Biol.* **156**, 215-31.

676 **Gal, R. and Libersat, F.** (2008). A parasitoid wasp manipulates the drive for walking  
677 of its cockroach prey. *Curr. Biol.* **18**, 877-82.

678 **Gal, R. and Libersat, F.** (2010). A wasp manipulates neuronal activity in the sub-  
679 esophageal ganglion to decrease the drive for walking in its cockroach prey. *PLoS ONE* **5**,  
680 e10019.

681 **Götz, K. G.** (1980). Visual guidance in *Drosophila*. *Basic Life Sci.* **16**, 391-407.

682 **Graham, D.** (1972). A behavioural analysis of the temporal organisation of walking  
683 movements in the 1st instar and adult stick insect (*Carausius morosus*). *J. Comp. Physiol. A.*  
684 **81**, 23-52.

685 **Graham, D.** (1977). Effect of Amputation and Leg Restraint on Free Walking  
686 Coordination of Stick Insect *Carausius morosus*. *J. Comp. Physiol. A.* **116**, 91-116.

687 **Graham, D.** (1985). Pattern and Control of Walking in Insects. In *Advances in Insect*  
688 *Physiology*, vol. Volume 18 eds. J. E. T. M.J. Berridge and V. B. Wigglesworth), pp. 31-140:  
689 Academic Press.

690 **Graham, D. and Cruse, H.** (1981). Coordinated Walking of Stick Insects on a  
691 Mercury Surface. *J. Exp. Biol.* **92**, 229-241.

692 **Gruhn, M., Hoffmann, O., Dübbert, M., Scharstein, H. and Büschges, A.** (2006).  
693 Tethered stick insect walking: A modified slippery surface setup with optomotor stimulation  
694 and electrical monitoring of tarsal contact. *J. Neurosci. Meth.* **158**, 195-206.

695 **Hoyt, D. F. and Taylor, C. R.** (1981). Gait and the Energetics of Locomotion in  
696 Horses. *Nature* **292**, 239-240.

697 **Hughes, G. M.** (1952). The Co-Ordination of Insect Movements. I. The Walking  
698 Movements of Insects. *J. Exp. Biol.* **29**, 267-285.

699 **Hughes, G. M.** (1957). The Co-Ordination of Insect Movements. II. The effect of  
700 limb amputation and the cutting of commissures in the cockroach. *J. Exp. Biol.* **34**, 306-333.

701           **Johnston, R. M. and Levine, R. B.** (1996). Locomotory behavior in the hawkmoth  
702 *Manduca sexta*: kinematic and electromyographic analyses of the thoracic legs in larvae and  
703 adults. *J. Exp. Biol.* **199**, 759-74.

704           **Johnston, R. M. and Levine, R. B.** (2002). Thoracic leg motoneurons in the isolated  
705 CNS of adult *Manduca* produce patterned activity in response to pilocarpine, which is distinct  
706 from that produced in larvae. *Inv. Neurosci.* **4**, 175-92.

707           **Kalmus, H.** (1943). The optomotor responses of some eye mutants of *Drosophila*. *J.*  
708 *Genet.* **45**, 206-213.

709           **Kozacik, J. J.** (1981). Stepping Patterns in the Cockroach, *Periplaneta Americana*. *J.*  
710 *Exp. Biol.* **90**, 357-360.

711           **Martin, J. R.** (2004). A portrait of locomotor behaviour in *Drosophila* determined by  
712 a video-tracking paradigm. *Behav. Proc.* **67**, 207-19.

713           **Martin, J. R., Ernst, R. and Heisenberg, M.** (1999). Temporal pattern of locomotor  
714 activity in *Drosophila melanogaster*. *J. Comp. Physiol. A.* **184**, 73-84.

715           **Monastiriotti, M., Linn, C. E., Jr. and White, K.** (1996). Characterization of  
716 *Drosophila* tyramine beta-hydroxylase gene and isolation of mutant flies lacking octopamine.  
717 *J. Neurosci.* **16**, 3900-11.

718           **Orlovsky, G. N., Deliagina, T. G. and Grillner, S.** (1999). Neuronal Control of  
719 Locomotion: From Mollusc to Man. New York: Oxford University Press, USA.

720           **Pearson, K. G. and Iles, J. F.** (1973). Nervous Mechanisms Underlying  
721 Intersegmental Co-Ordination of Leg Movements During Walking in the Cockroach. *J. Exp.*  
722 *Biol.* **58**, 725-744.

723           **Poeck, B., Triphan, T., Neuser, K. and Strauss, R.** (2008). Locomotor control by  
724 the central complex in *Drosophila* - An analysis of the tay bridge mutant. *Dev. Neurobiol.* **68**,  
725 1046-58.

726           **Ryckebusch, S. and Laurent, G.** (1993). Rhythmic patterns evoked in locust leg  
727 motor neurons by the muscarinic agonist pilocarpine. *J. Neurophysiol.* **69**, 1583-1595.

728           **Scholz, H.** (2005). Influence of the biogenic amine tyramine on ethanol-induced  
729 behaviors in *Drosophila*. *J. Neurobiol.* **63**, 199-214.

730           **Serway, C. N., Kaufman, R. R., Strauss, R. and de Belle, J. S.** (2009). Mushroom  
731 bodies enhance initial motor activity in *Drosophila*. *J. Neurogenet.* **23**, 173-84.

732           **Sitaraman, D., Zars, M., LaFerriere, H., Chen, Y. C., Sable-Smith, A., Kitamoto,**  
733 **T., Rottinghaus, G. E. and Zars, T.** (2008). Serotonin is necessary for place memory in  
734 *Drosophila*. *Proc. Natl. Acad. Sci. U.S.A.* **105**, 5579-5584.

735           **Spirito, C. P. and Mushrush, D. L.** (1979). Interlimb Coordination During Slow  
736 Walking in the Cockroach: I. Effects of Substrate Alterations. *J. Exp. Biol.* **78**, 233-243.

737           **Strauss, R. and Heisenberg, M.** (1990). Coordination of legs during straight walking  
738 and turning in *Drosophila melanogaster*. *J. Comp. Physiol. A.* **167**, 403-12.

739           **Strauss, R. and Heisenberg, M.** (1993). A higher control center of locomotor  
740 behavior in the *Drosophila* brain. *J. Neurosci.* **13**, 1852-61.

741           **Wendler, G.** (1964). Laufen und Stehen der Stabheuschrecke *Carausius morosus*:  
742 Sinnesborstenfelder in den Beingelenken als Glieder von Regelkreisen. *J. Comp. Physiol. A.*  
743 **48**, 198-250.

744           **Wendler, G.** (1966). The co-ordination of walking movements in arthropods. *Symp.*  
745 *Soc. Exp. Biol.* **20**, 229-49.

746           **Wilson, D. M.** (1966). Insect walking. *Annu. Rev. Entomol.* **11**, 103-22.

747           **Wolf, F. W., Rodan, A. R., Tsai, L. T.-Y. and Heberlein, U.** (2002). High-  
748 Resolution Analysis of Ethanol-Induced Locomotor Stimulation in *Drosophila*. *J. Neurosci.*  
749 **22**, 11035-11044.

750           **Zollikofer, C. P. E.** (1994). Stepping Patterns in Ants .1. Influence of Speed and  
751 Curvature. *J. Exp. Biol.* **192**, 95-106.

752           **Zumstein, N., Forman, O., Nongthomba, U., Sparrow, J. C. and Elliott, C. J. H.**  
753 (2004). Distance and force production during jumping in wild-type and mutant *Drosophila*  
754 *melanogaster*. *J. Exp. Biol.* **207**, 3515-3522.

755

756 **Figure Legends:**

757

758 **Figure 1:** A: Schematic of the experimental setup. Flies walked spontaneously back and forth  
759 on a walkway along the direction of the red arrow. Walks were recorded through a 20mm  
760 wide window simultaneously from one side and from below (a: acrylic glass, inside coated  
761 with a layer of Fluon to prevent the flies from scaling the glass; b: 5 mm wide transparent  
762 walkway; c: camera viewpoint; d: camera field of view, free of Fluon; e: glass prism, provid-  
763 ing a ventral view of the walkway). B: Exemplary lateral view of a male *Drosophila*,  $wt^{CS}$ ,  
764 during one of the recorded walks. C: Ventral view of the same fly in the same video frame.  
765 Tips of the tarsi are marked with colored circles. (R1, R2, R3: right front, middle, and hind  
766 leg; L1, L2, L3: left front, middle, and hind leg). Red and green arrows indicate origin and  
767 orientation of the body coordinate system.

768

769 **Figure 2:** Walking parameters of  $wt^{CS}$ . A: Footfall pattern of all six legs during (i) 0.5 s of  
770 one faster trial, (ii) 0.5 s of one slower trial and (iii) walking speed of the body during the 0.5  
771 s of the trials shown in Ai (magenta graph) and Aii (green graph) (BL = body lengths; R1, R2,  
772 R3: right front, middle, and hind leg; L1, L2, L3: left front, middle, and hind leg). Black bars  
773 indicate swing phase, white bars indicate stance phase, magenta lines indicate onset and end  
774 of complete step cycles in the faster trial, green bars in the slower trial, respectively. Shaded  
775 areas highlight coordination patterns of interest (see main text). B: Average stance trajectories  
776 of all legs of all trials in relative body coordinates. C: Phase plots of swing onset of all legs  
777 with respect to the left front leg (blue: data from all trials; magenta: data from Ai; green: data  
778 from Aii; black line: mean vector, length of mean vector indicates variance).

779

780 **Figure 3:** Evaluation of leg stepping parameters of  $wt^{CS}$ . A: Swing duration as a function of  
781 cycle period (black: data from all trials; magenta: data from trial in 2Ai; green: data from trial  
782 in 2Aii). B: Walking speed as a function of cycle period (same color coding as in A). C: Step  
783 amplitude as a function of cycle period (same color coding as in A). D: Walking speed as a  
784 function of step amplitude (same color coding as in A). Each panel contains a regression line  
785 for the complete data set (black) as well as several further regression lines (gray) each of  
786 which is associated with one trial (n = 15).

787 **Figure 4:** Walking parameters of  $w^{Berlin}$ . A: Footfall pattern of all six legs during (i) 0.5 s of  
788 one faster trial, (ii) 0.5s of one slower trial and (iii) walking speed of the body during the 0.5 s  
789 of the trials shown in Ai (magenta graph) and 2Aii (green graph) (BL = body lengths; R1, R2,  
790 R3: right front, middle, and hind leg; L1, L2, L3: left front, middle, and hind leg). Black bars  
791 indicate swing phase, white bars indicate stance phase, magenta lines indicate onset and end  
792 of complete step cycles in the faster trial, green bars in the slower trial, respectively. Shaded  
793 areas highlight coordination patterns of interest (see main text). B: Average stance trajectories  
794 of all legs of all trials in relative body coordinates. C: Phase plots of swing onset of all legs  
795 with respect to the left front leg (blue: data from all trials; magenta: data from the Ai; green:  
796 data from Aii; black line: mean vector, length of mean vector indicates variance). D: Cycle  
797 period as a function of walking speed (black: data from all trials; magenta: data from Ai;  
798 green: data from Aii). E: Step amplitude as a function of walking speed (black: data from all  
799 trials; magenta: data from Ai; green: data from Aii).

800

801 **Figure 5:** Walking parameters of  $w^{III8}$ . A: Footfall pattern of all six legs during (i) 0.5 s of  
802 one faster trial, (ii) 0.5 s of one slower trial and (iii) walking speed of the body during the 0.5  
803 s of the trials shown in Ai (magenta graph) and Aii (green graph) (BL = body lengths; R1, R2,  
804 R3: right front, middle, and hind leg; L1, L2, L3: left front, middle, and hind leg). Black bars  
805 indicate swing phase, white bars indicate stance phase, magenta lines indicate onset and end  
806 of complete step cycles in the faster trial, green bars in the slower trial, respectively. Shaded  
807 areas highlight coordination patterns of interest (see main text). B: Average stance trajectories  
808 of all legs of all trials in relative body coordinates. C: Phase plots of swing onset of all legs  
809 with respect to the left front leg (blue: data from all trials; magenta: data from Ai; green: data  
810 from Aii; black line: mean vector, length of mean vector indicates variance). D: Cycle period  
811 as a function of walking speed (black: data from all trials; magenta: data from Ai; green: data  
812 from Aii). E: Step amplitude as a function of walking speed (black: data from all trials; ma-  
813 genta: data from Ai; green: data from Aii).

814

815 **Figure 6:** Walking parameters of  $w^{III8}$ ,  $Tbh^{nMI8}$ . A: Footfall pattern of all six legs during (i)  
816 0.5 s of one faster trial, (ii) 0.5 s of one slower trial and (iii) walking speed of the body during  
817 the 0.5 s of the trials shown in Ai (magenta graph) and Aii (green graph) (BL = body lengths;  
818 R1, R2, R3: right front, middle, and hind leg; L1, L2, L3: left front, middle, and hind leg).

819 Black bars indicate swing phase, white bars indicate stance phase, magenta lines indicate on-  
820 set and end of complete step cycles in the faster trial, green bars in the slower trial, respective-  
821 ly. Shaded areas highlight coordination patterns of interest (see main text). B: Average stance  
822 trajectories of all legs of all trials in relative body coordinates. C: Phase plots of swing onset  
823 of all legs with respect to the left front leg (blue: data from all trials; magenta: data from Ai;  
824 green: data from Aii; black line: mean vector, length of mean vector indicates variance). D:  
825 Cycle period as a function of walking speed (black: data from all trials; magenta: data from  
826 Ai; green: data from Aii). E: Step amplitude as a function of walking speed (black: data from  
827 all trials; magenta: data from Ai; green: data from Aii).

828

829 **Figure 7:** Analysis of inter-leg coordination. A: Relative frequency of tripod, tetrapod and  
830 undefined coordination in the four different strains (BL = body length, for definition of coordi-  
831 nation types see main text). B: Relative frequency of tripod, tetrapod and undefined coordi-  
832 nation at slow walking speeds ( $< 5 \text{ BL s}^{-1}$ ), medium speeds ( $5 \text{ to } 10 \text{ BL s}^{-1}$ ) and high speeds  
833 ( $> 10 \text{ BL s}^{-1}$ ). C to F: Tripod coordination strength (TCS, for definition see main text) as a  
834 function of walking speed for the different strains. C:  $w^{CS}$ , D:  $w^{Berlin}$ , E:  $w^{1118}$ , and F:  $w^{1118}$ ,  
835  $Tbh^{nM18}$ . G: Five exemplary footfall patterns with TCS of 0.8, 0.6, 0.4, 0.2, and 0.1 taken from  
836 footfall patterns of five different flies. Shaded areas highlight the concurrent overlap of swing  
837 phases in the legs of one tripod group.

838

839 **Figure 8:** Walking parameters of  $w^{CS}$  after removal of one hind leg. A: Footfall pattern of all  
840 six legs during (i) 0.5 s of one faster trial, (ii) 0.5 s of one slower trial and (iii) walking speed  
841 of the body during the 0.5 s of the trials shown in Ai (magenta graph) and Aii (green graph)  
842 (BL = body lengths; R1, R2, R3: right front, middle, and hind leg; L1, L2, L3: left front, mid-  
843 dle, and hind leg). Black bars indicate swing phase, white bars indicate stance phase, magenta  
844 lines indicate onset and end of complete step cycles in the faster trial, green bars in the slower  
845 trial, respectively. B: Average stance trajectories of all legs of all trials in relative body coordi-  
846 nates. Black arrows indicate the shifts of AEP and PEP (cf. Fig. 2B). C: Phase plots of  
847 swing onset of all legs with respect to the left front leg (blue: data from all trials; magenta:  
848 data from Aii; green: data from Aii; black line: mean vector, length of mean vector indicates  
849 variance). D: Cycle period as a function of walking speed (black: data from all trials; magenta:  
850 ta: data from Ai; green: data from Aii). For comparison, gray inset shows rescaled data from

851 Fig. 3B. E: Step amplitude as a function of walking speed (black: data from all trials; magen-  
852 ta: data from Ai; green: data from Aii).

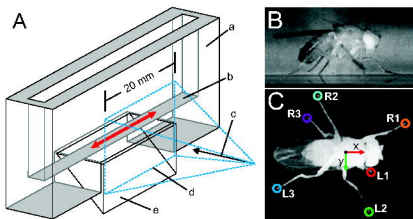



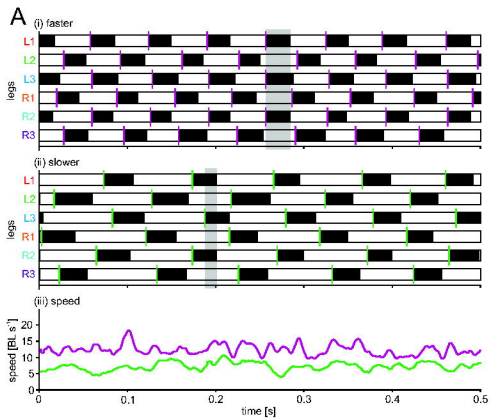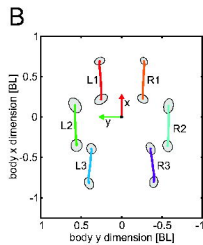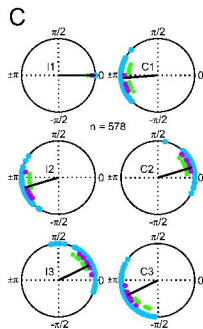

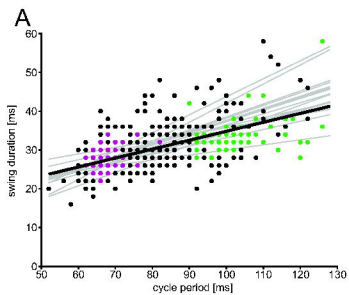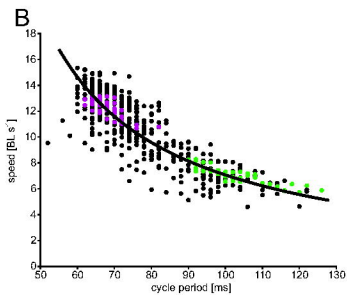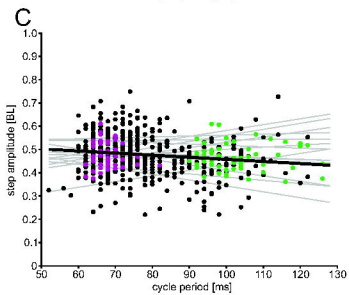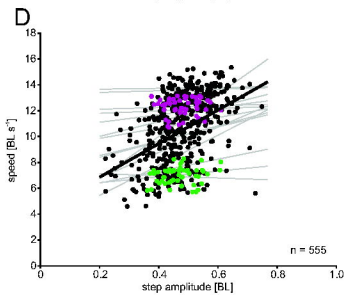

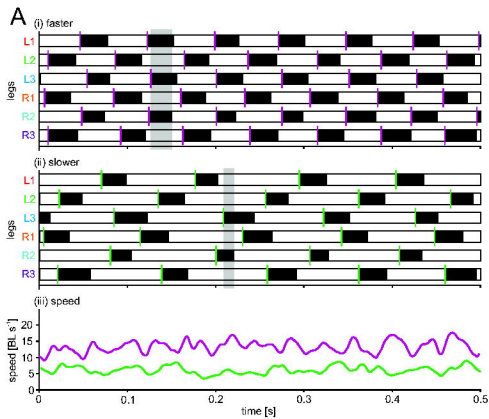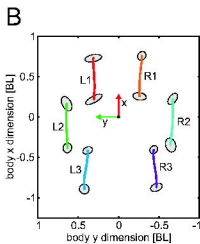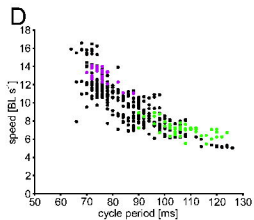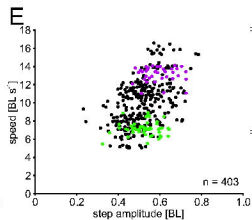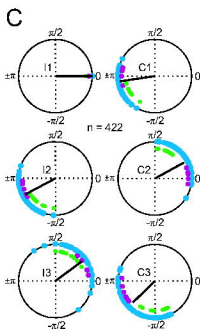

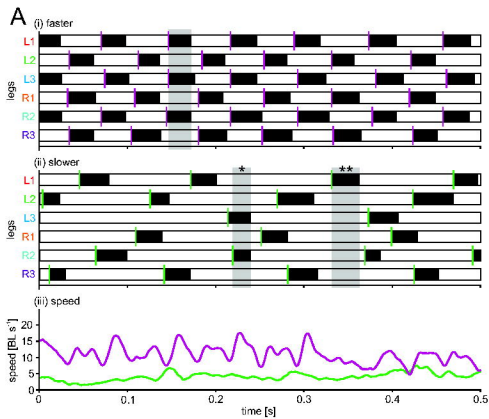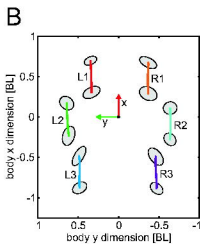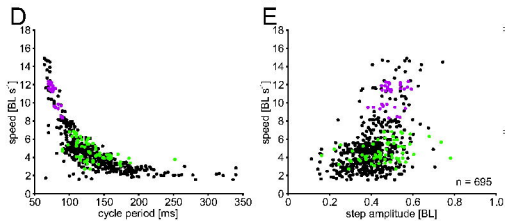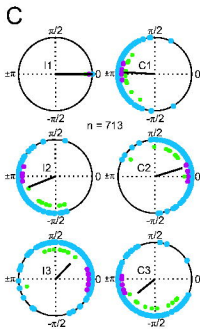



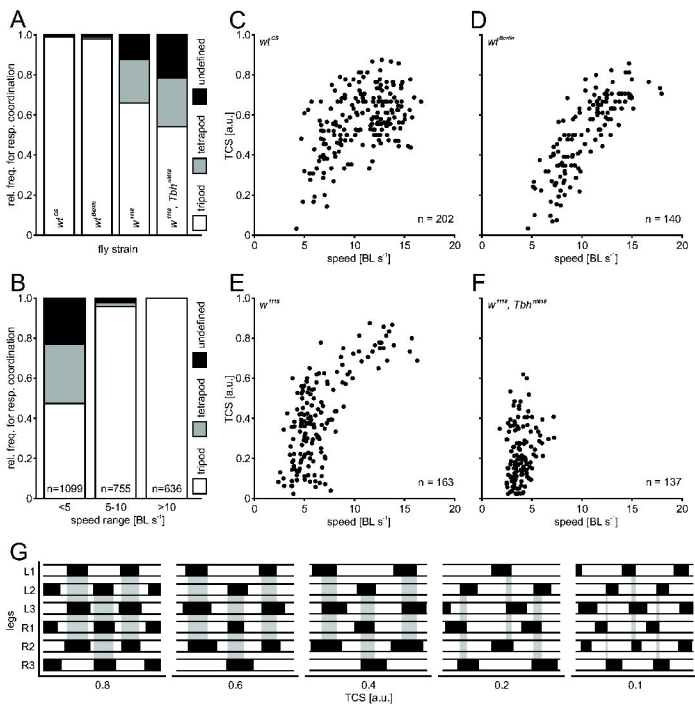

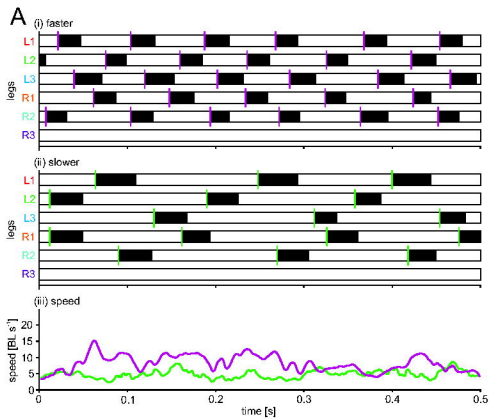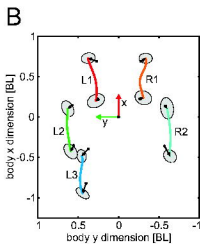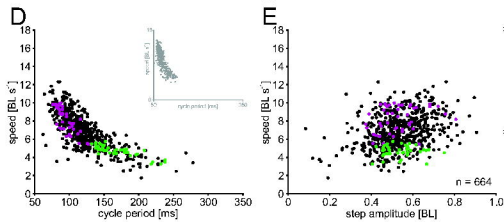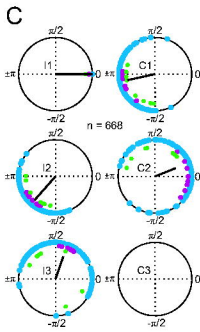

**Table 1**

|                        | Male        |    |                 |   | Female      |    |
|------------------------|-------------|----|-----------------|---|-------------|----|
|                        | weight [mg] | N  | size [mm]       | N | weight [mg] | N  |
| $w^{CS}$               | 0.70        | 29 | $2.06 \pm 0.08$ | 6 | 1.17        | 29 |
| $w^{Berlin}$           | 0.86        | 22 | $2.12 \pm 0.01$ | 3 | 1.32        | 22 |
| $w^{1118}$             | 0.70        | 27 | $2.09 \pm 0.08$ | 5 | 1.05        | 35 |
| $w^{1118}, TbH^{nM18}$ | 0.71        | 12 | $2.07 \pm 0.03$ | 5 | 1.21        | 9  |
